# Supplementary material for: An evaluation of the organ procurement and transplantation network's expanded post-transplant performance metrics
Source: Frontiers journal article supplement (doi:10.3389/frtra.2023.1237112), 2023-08-16

## **Supplementary Appendix**

Supplement to: An evaluation of the Organ Procurement and Transplantation Network's expanded post-transplant performance metrics

This appendix has been provided by the authors to give readers additional information about the work.

## **Supplementary appendix for:**

An evaluation of the Organ Procurement and Transplantation Network's expanded post-transplant performance metrics

### **Contents**

|                                                                                                                                  |    |
|----------------------------------------------------------------------------------------------------------------------------------|----|
| <b>Supplemental Figure 1.</b> 1-year Baseline Hazard Ratio Density, Spring 2022 .....                                            | 3  |
| <b>Supplemental Figure 2.</b> 90-day Baseline Hazard Ratio Density, Spring 2022 .....                                            | 4  |
| <b>Supplemental Figure 3.</b> 1-year Conditional Baseline Hazard Ratio Density, Spring 2022 .....                                | 5  |
| <b>Supplemental Figure 4.</b> 1-year Baseline Hazard Ratio Density, Fall 2022 .....                                              | 6  |
| <b>Supplemental Figure 5.</b> 90-day Baseline Hazard Ratio Density, Fall 2022 .....                                              | 7  |
| <b>Supplemental Figure 6.</b> 1-year Conditional Baseline Hazard Ratio Density, Fall 2022.....                                   | 8  |
| <b>Supplemental Figure 7.</b> Contingency Tables for 90-day versus 1-year Conditional Cohorts by Hazard Ratio, Spring 2022 ..... | 9  |
| <b>Supplemental Figure 8.</b> Contingency Tables for 90-day versus 1-year Conditional Cohorts by Hazard Ratio, Fall 2022 .....   | 10 |
| <b>Supplemental Figure 9.</b> Interdependence Between the New Post-Transplant Evaluation Metrics, Spring and Fall 2022 .....     | 11 |

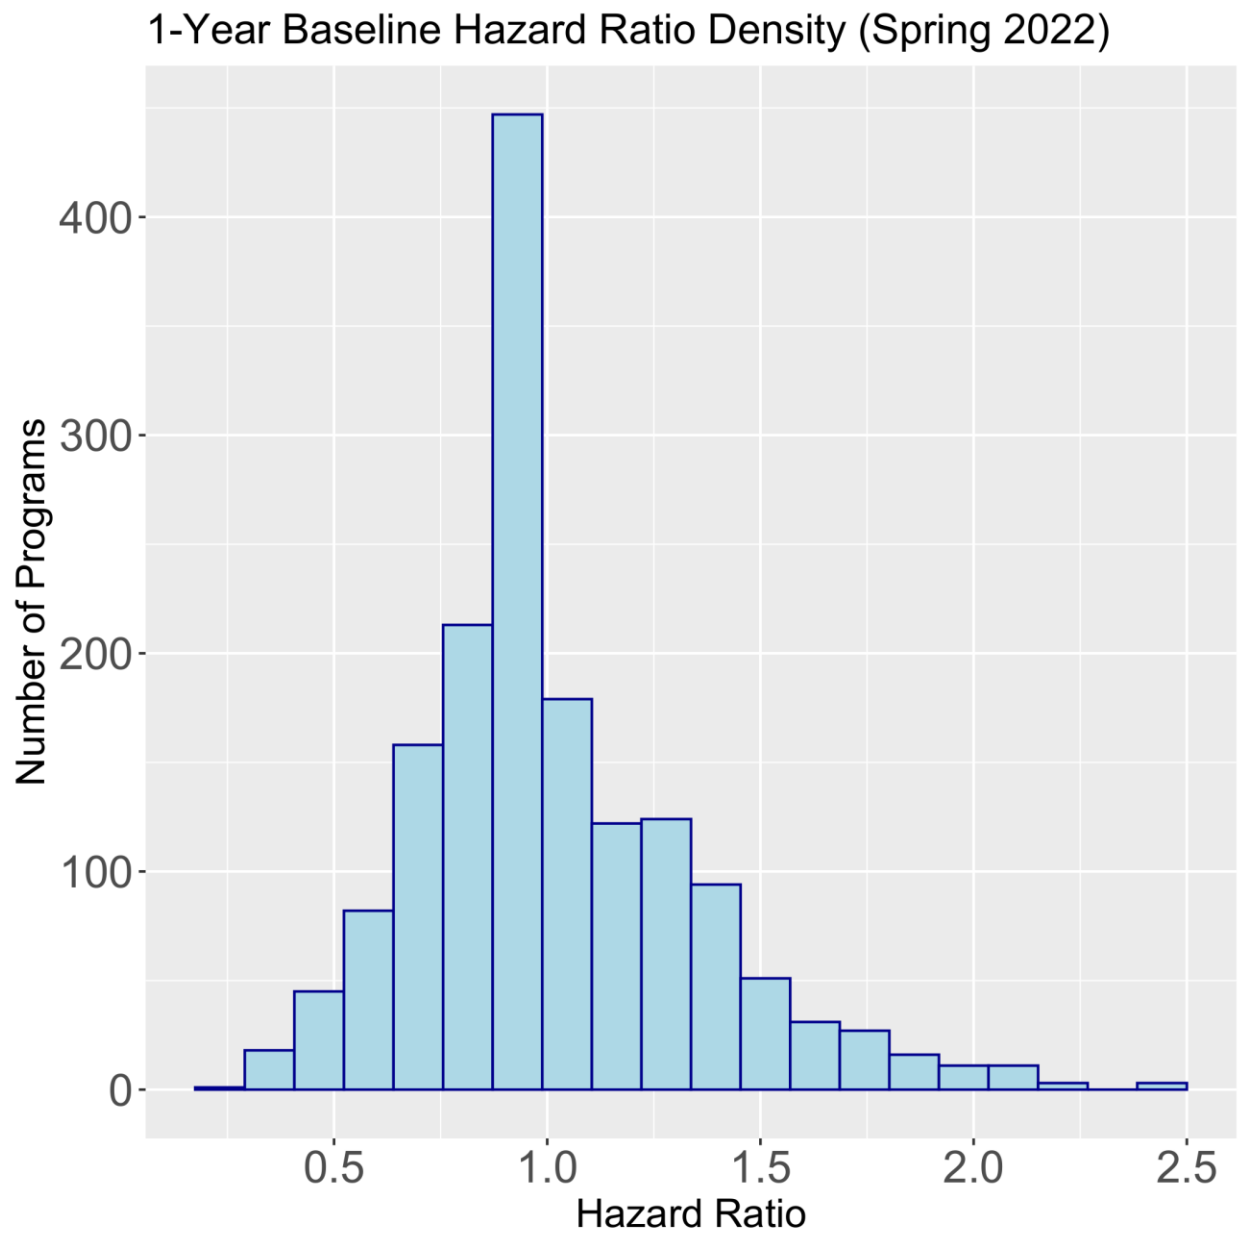

**Supplemental Figure 1. 1-year Baseline Hazard Ratio Density, Spring 2022.** Hazard ratios (HR) are provided for all programs (N=1,671). 1-year (1Y) hazard ratios ranged from 0.283 to 2.492 with a mean of 1.015, median of 0.959, and standard deviation of 0.324.

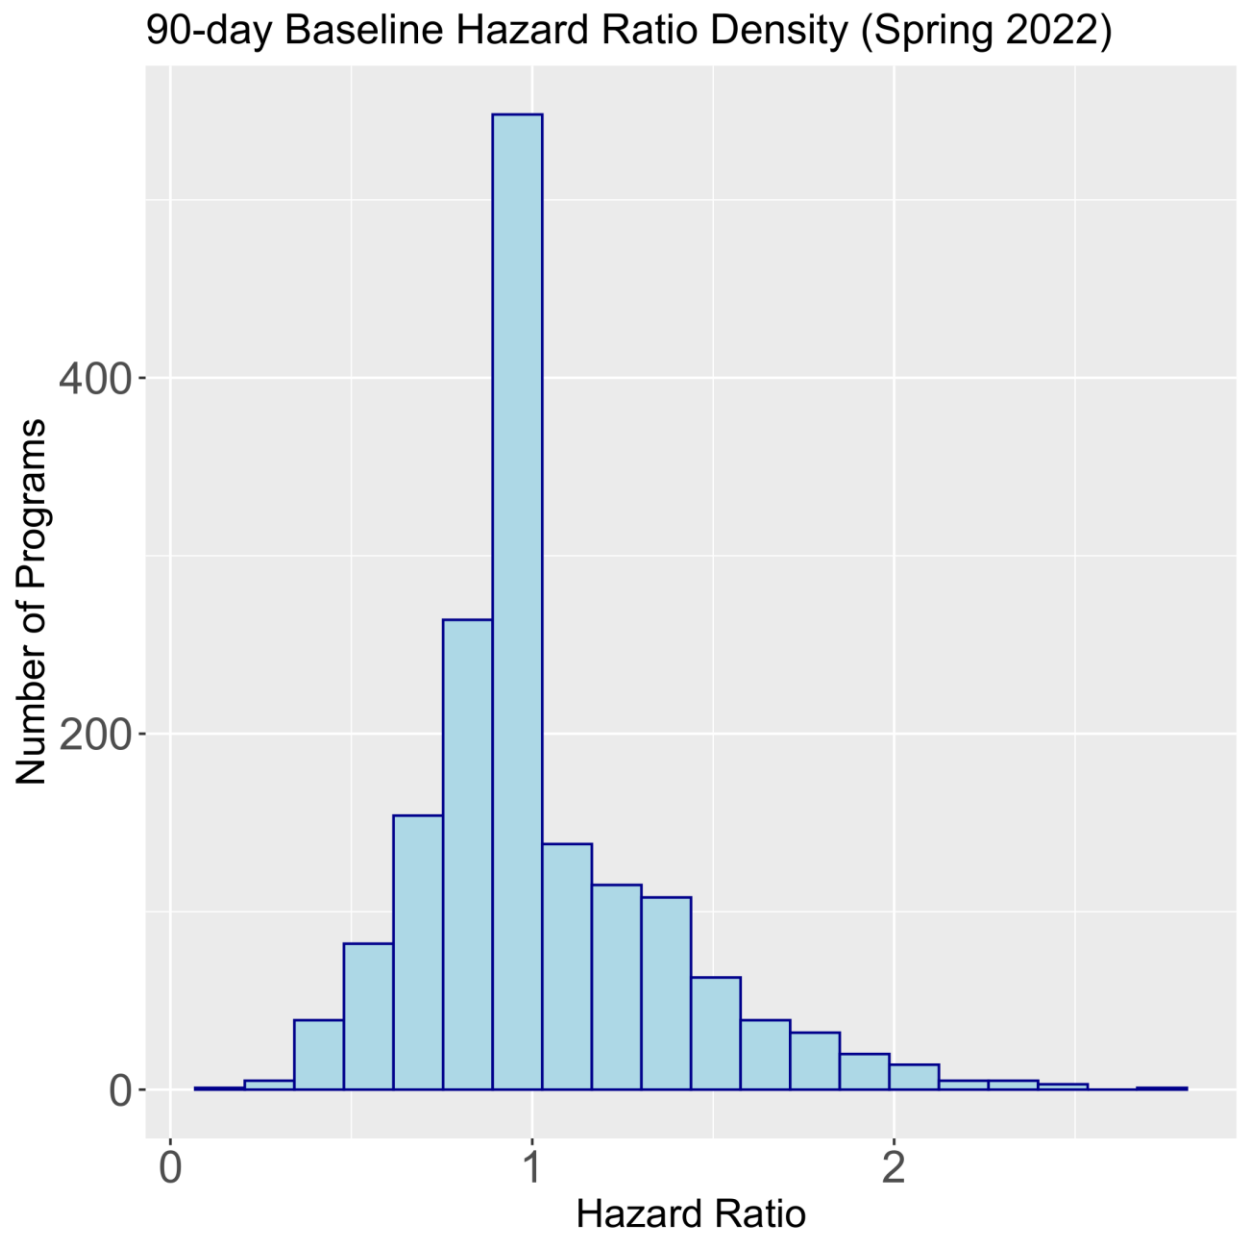

**Supplemental Figure 2. 90-day Baseline Hazard Ratio Density, Spring 2022.** Hazard ratios (HR) are provided for all programs (N=1,671). 1-year (1Y) hazard ratios ranged from 0.204 to 2.807 with a mean of 1.018, median of 0.964, and standard deviation of 0.339.

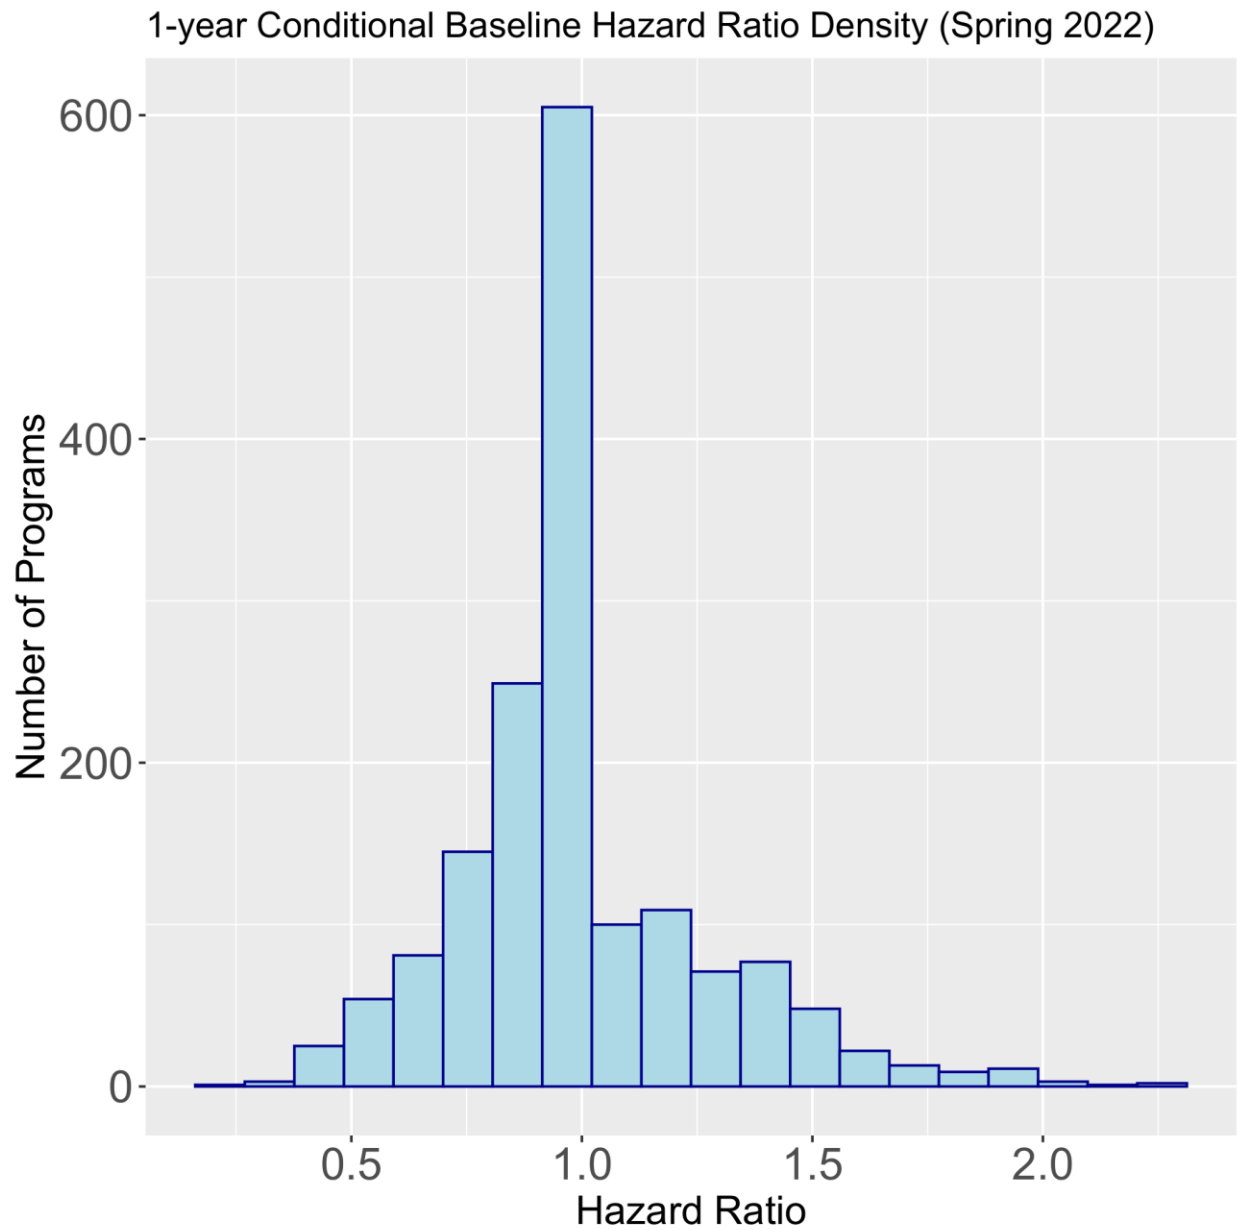

**Supplemental Figure 3. 1-year Conditional Baseline Hazard Ratio Density, Spring 2022.** Hazard ratios (HR) are provided for all programs (N=1,671). 1-year (1Y) hazard ratios ranged from 0.23 to 2.27 with a mean of 0.996, median of 0.973, and standard deviation of 0.269.

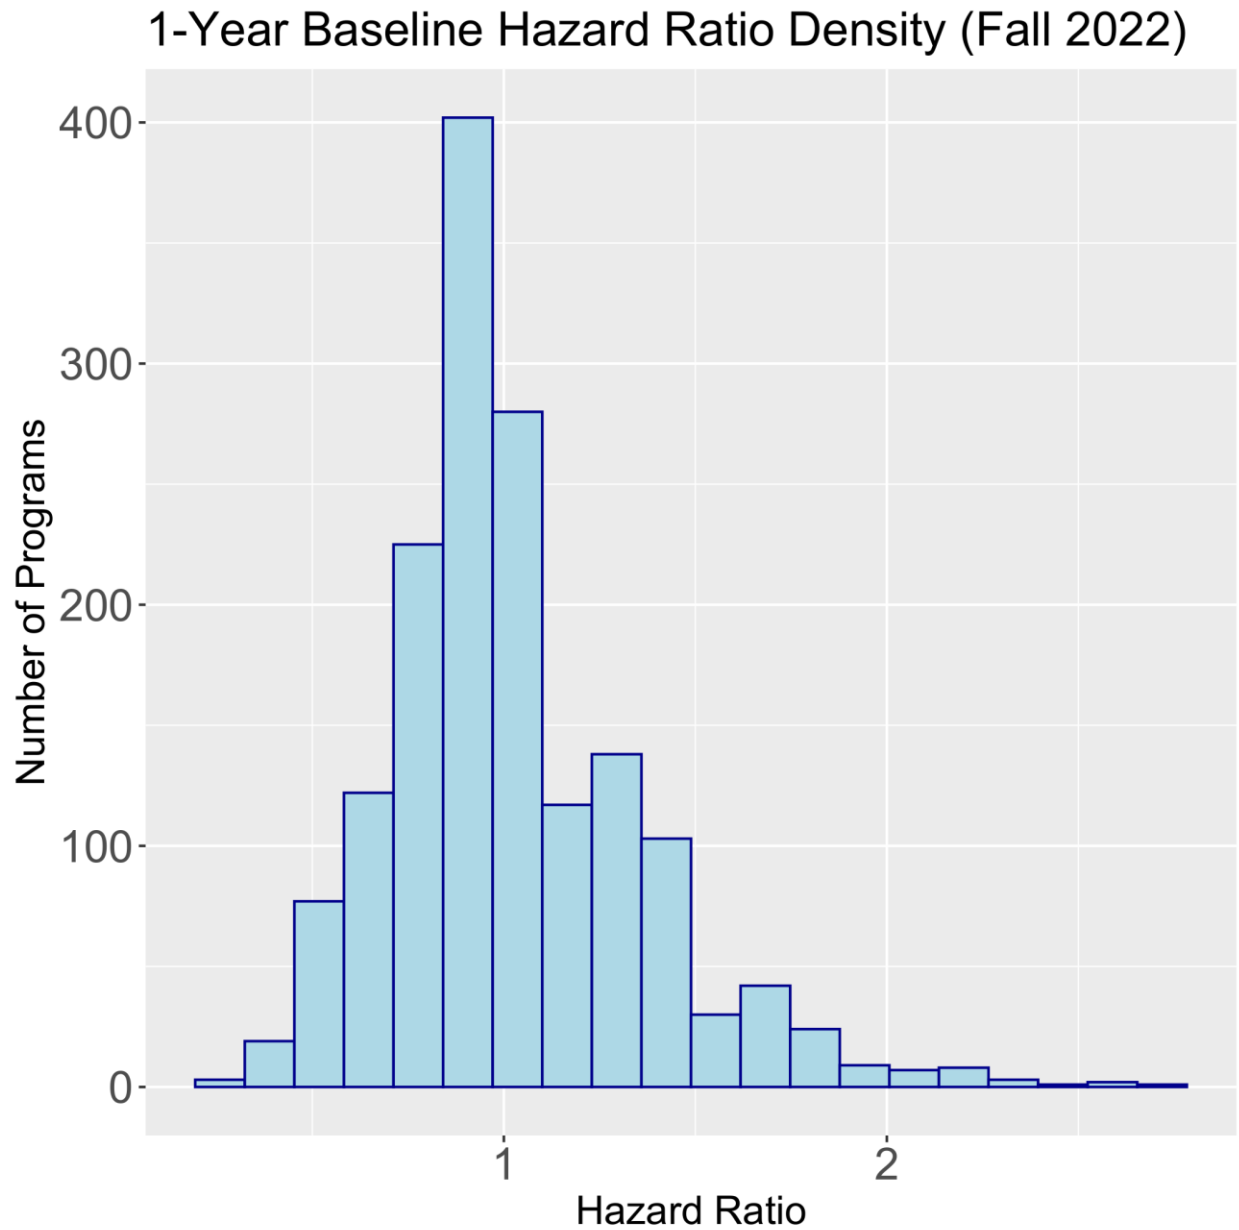

**Supplemental Figure 4. 1-year Baseline Hazard Ratio Density, Fall 2022.** Hazard ratios (HR) are provided for all programs (N=1,931). 1-year (1Y) hazard ratios ranged from 0.253 to 2.713 with a mean of 1.02, median of 0.96, and standard deviation of 0.331.

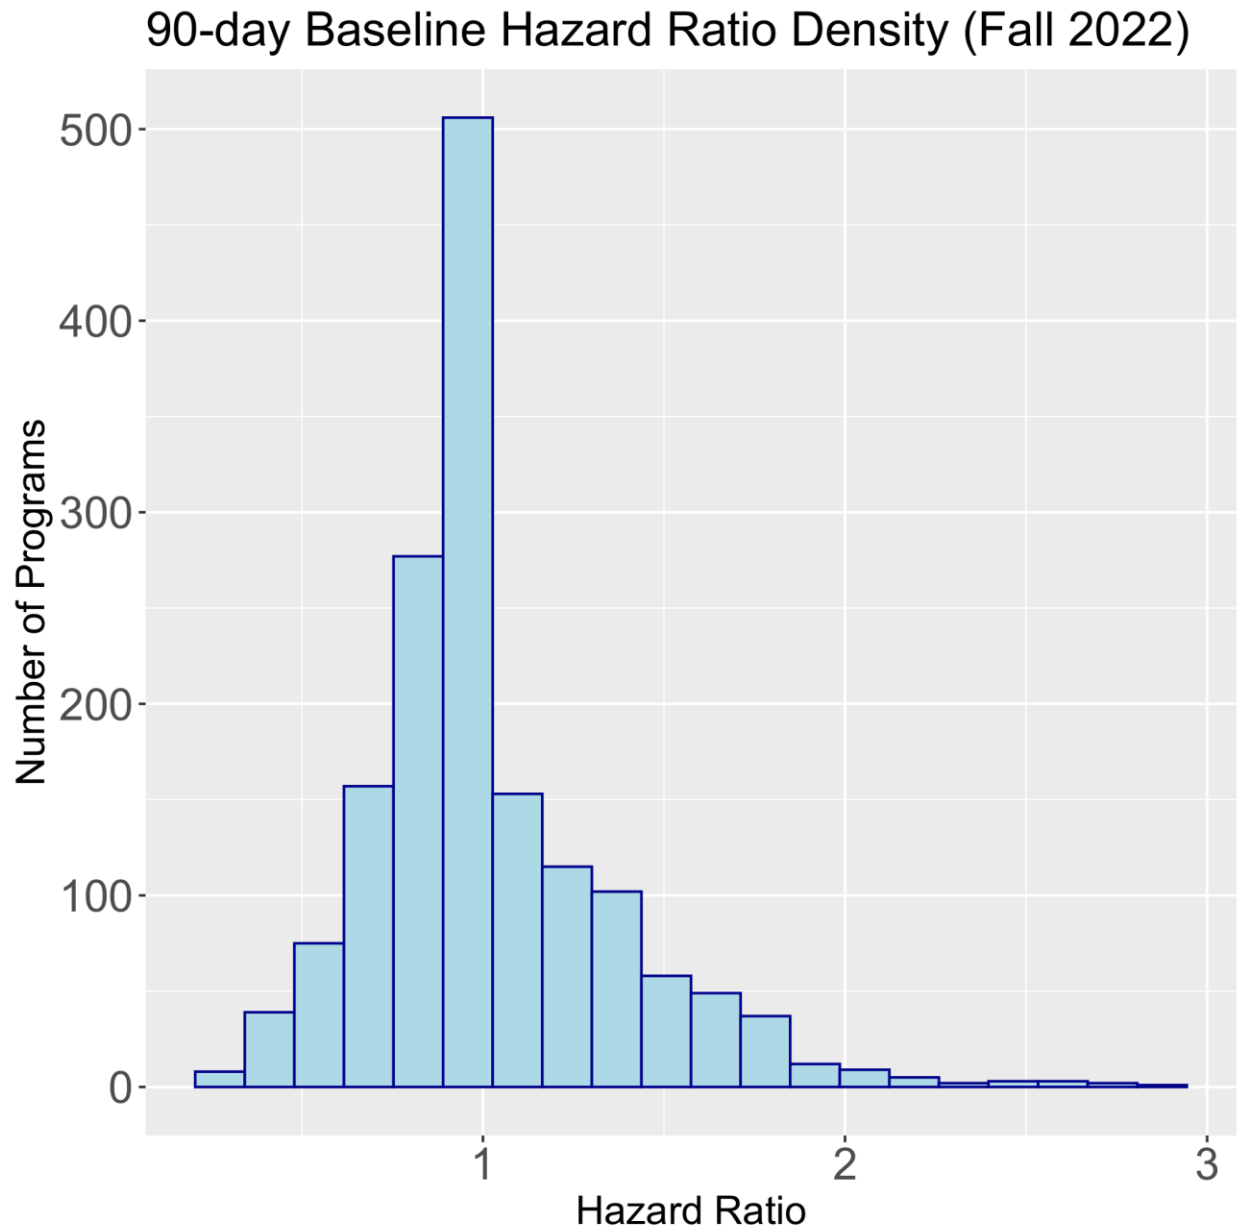

**Supplemental Figure 5. 90-day Baseline Hazard Ratio Density, Fall 2022.** Hazard ratios (HR) are provided for all programs (N=1,931). 1-year (1Y) hazard ratios ranged from 0.261 to 2.863 with a mean of 1.02, median of 0.961, and standard deviation of 0.344.

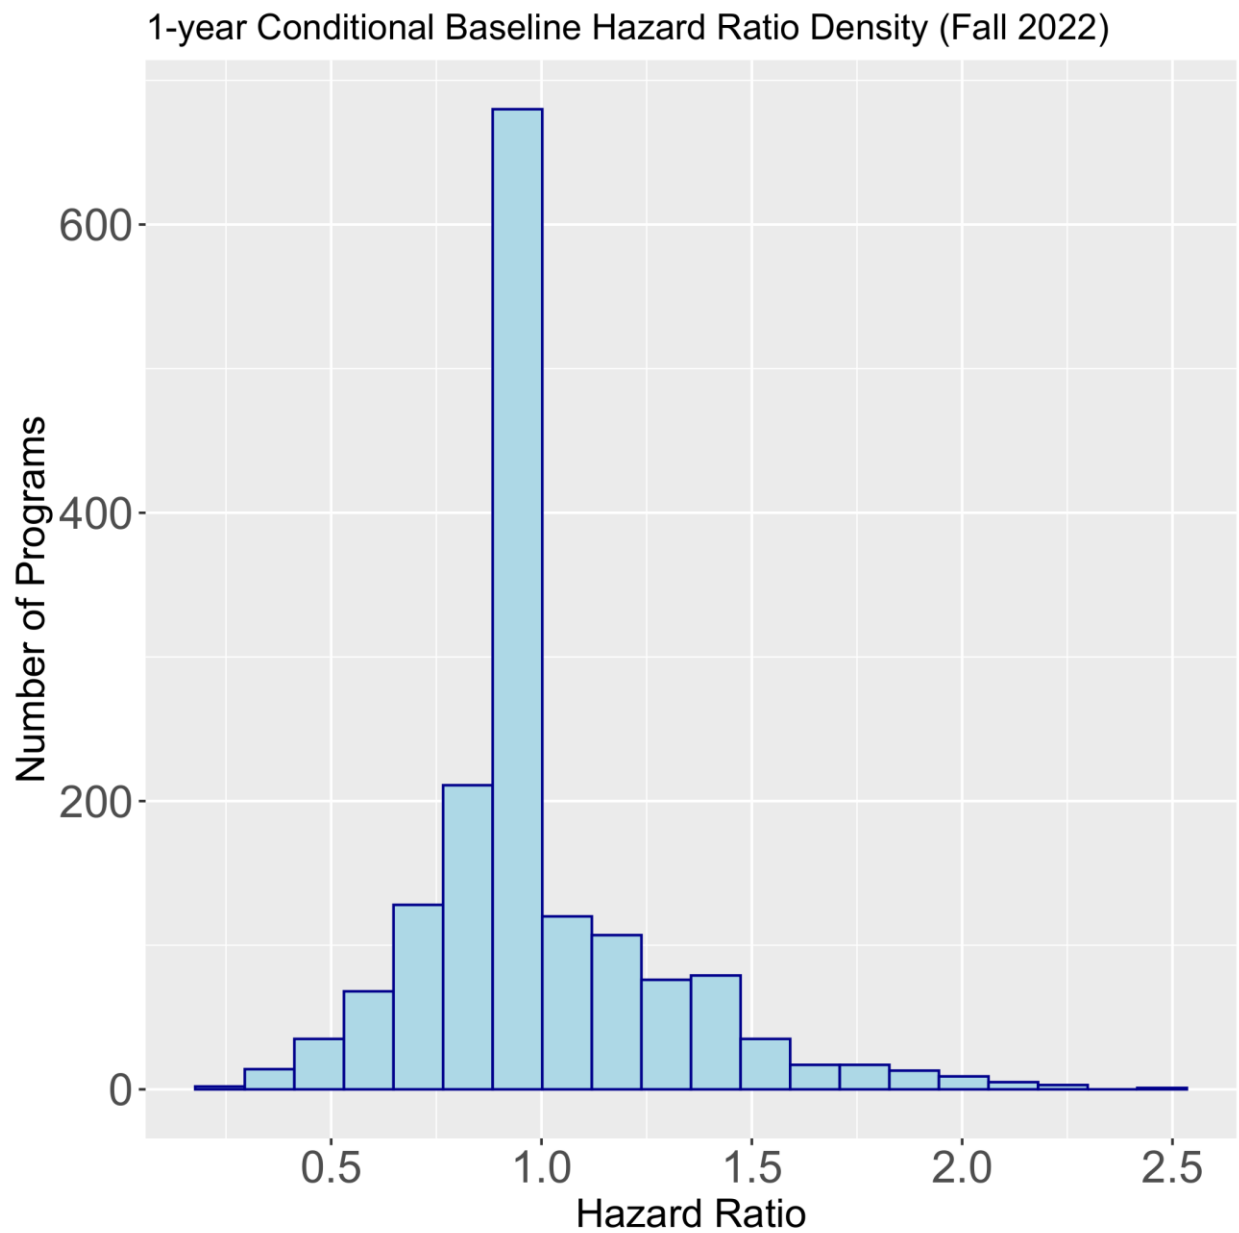

**Supplemental Figure 6. 1-year Conditional Baseline Hazard Ratio Density, Fall 2022.** Hazard ratios (HR) are provided for all programs (N=1,931). 1-year (1Y) hazard ratios ranged from 0.291 to 2.53 with a mean of 1, median of 0.974, and standard deviation of 0.281.



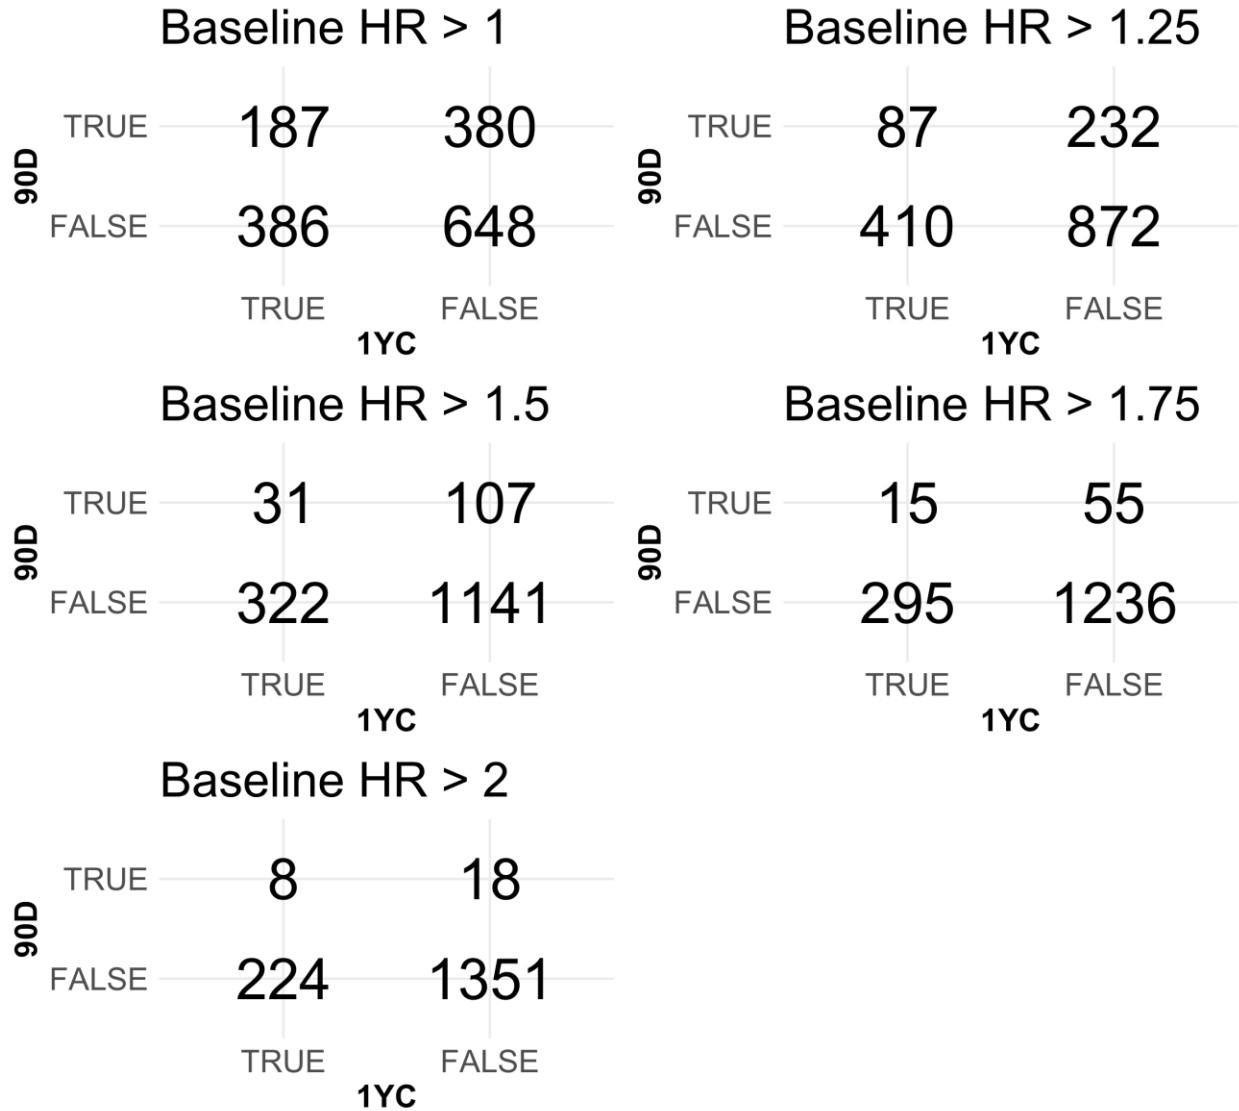

**Supplemental Figure 7. Contingency Tables for 90-day versus 1-year Conditional Cohorts by Hazard Ratio, Spring 2022.** Five contingency tables are provided for all programs (N=1,671) and organs with hazard ratios above five hazard ratio thresholds (1, 1.25, 1.5, 1.75, and 2). 90-day (90D) observations are on the y-axis and 1-year conditional (1YC) observations are on the x-axis for each table.

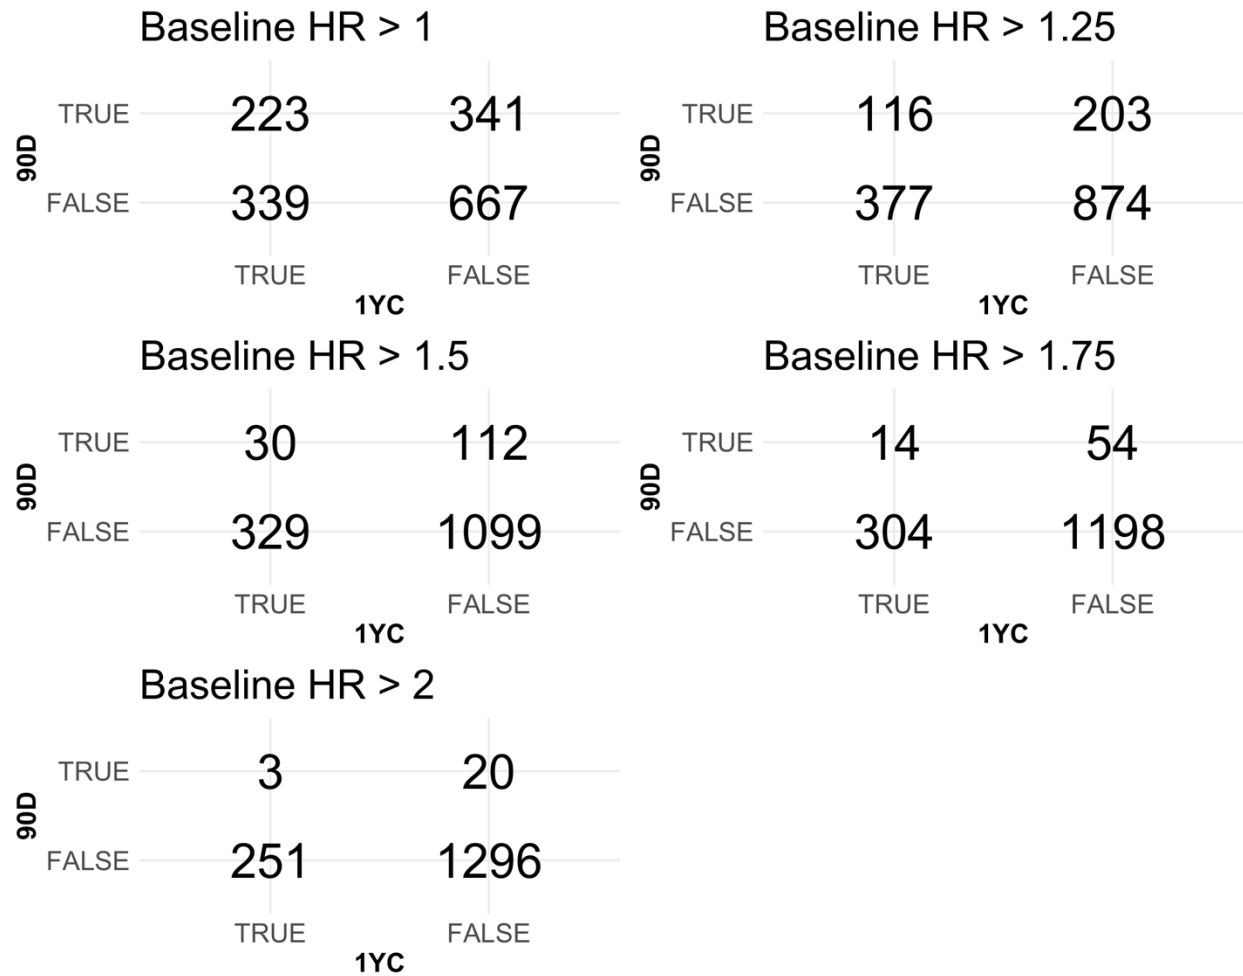

**Supplemental Figure 8. Contingency Tables for 90-day versus 1-year Conditional Cohorts by Hazard Ratio, Fall 2022.** Five contingency tables are provided for all programs (N=1,931) and organs with hazard ratios above five hazard ratio thresholds (1, 1.25, 1.5, 1.75, and 2). 90-day (90D) observations are on the y-axis and 1-year conditional (1YC) observations are on the x-axis for each table.

**Supplemental Figure 9. Interdependence Between the New Post-transplant Evaluation Metrics.** Correlation analysis for the Spring (top) and Fall 2022 (bottom) cohorts. The mean correlation coefficients between the 90D and 1YC90D cohorts for all organs (aggregate) ranged from -0.672 at HRs greater than 1.0 to -0.865 at HRs greater than 1.75 for the Spring 2022 cohort. Heart, kidney, liver, and lung correlation coefficients ranged from [-0.681 to -1], [-0.655 to -0.909], [-0.633 to -1], and [-0.455 to -0.679], respectively. For the Fall 2022 cohort, the aggregate correlation coefficients ranged from -0.605 to -0.927. Heart, kidney, liver, and lung HRs ranged from [-0.701 to -1], [-0.68 to -0.95], [-0.685 to -1], and [-0.514 to -1], respectively.

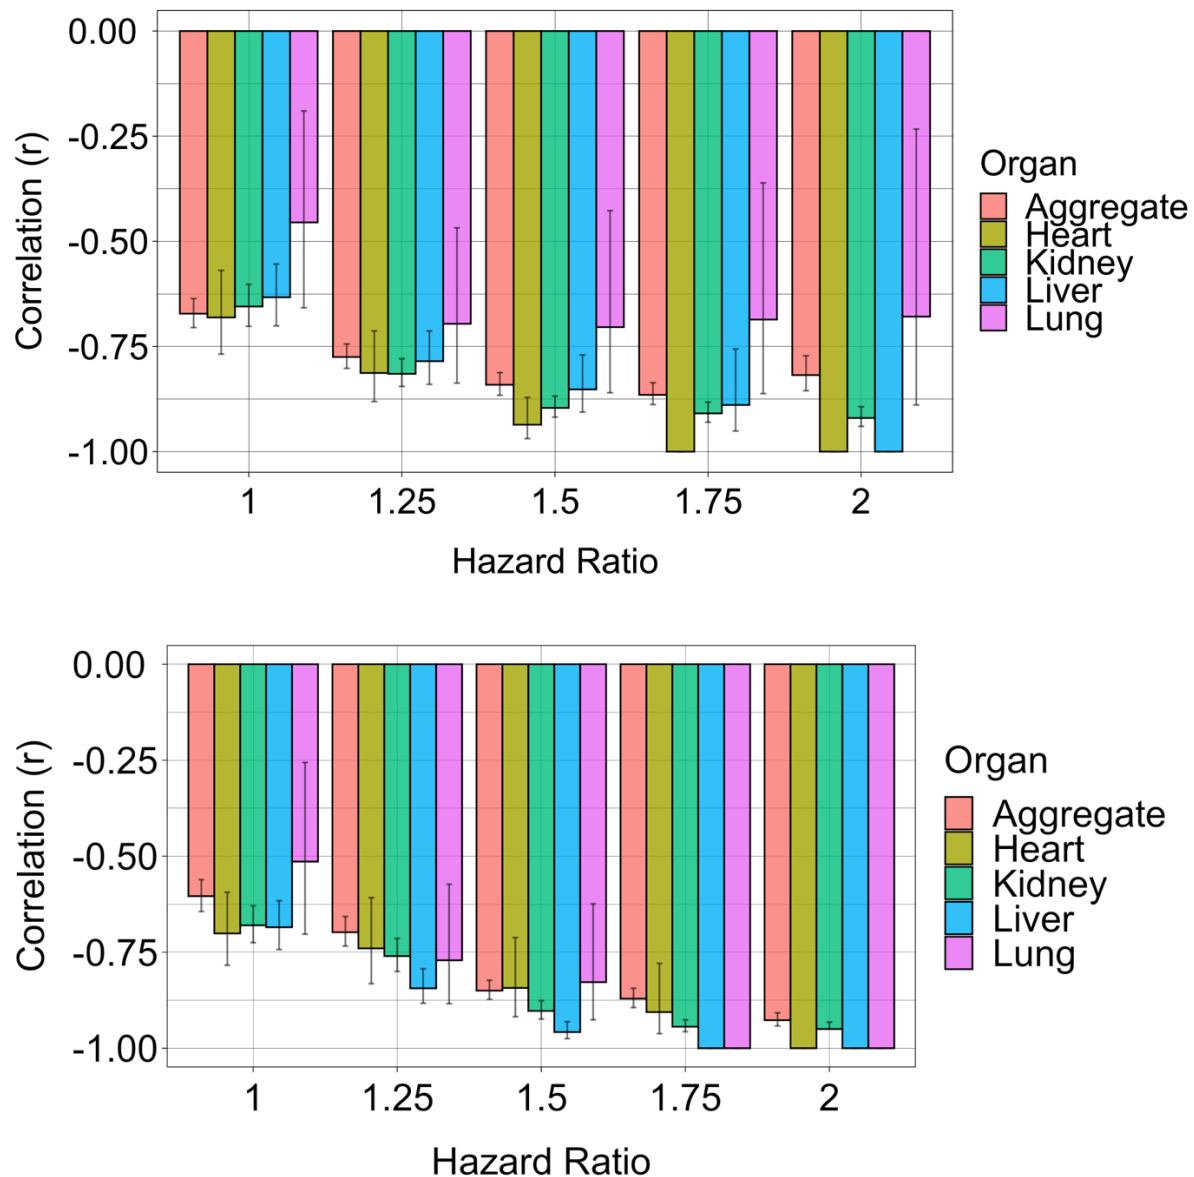

Supplement: Data_Sheet_1.pdf [file Data_Sheet_1.pdf]
